# Supplementary material for: A hypoxia- and telomerase-responsive oncolytic adenovirus expressing secretable trimeric TRAIL triggers tumour-specific apoptosis and promotes viral dispersion in TRAIL-resistant glioblastoma
Source: PubMed Central journal article supplement (PMC5780382; doi:10.1038/s41598-018-19300-6), 2018-01-23
Supplement: 41598_2018_19300_MOESM1_ESM.pdf [file 41598_2018_19300_MOESM1_ESM.pdf]

1  
2  
3  
4  
5  
6  
7  
8  
9  
10  
11  
12  
13  
14  
15  
16  
17  
18  
19  
20  
21  
22  
23  
24

**A hypoxia- and telomerase-responsive oncolytic adenovirus expressing secretable trimeric TRAIL triggers tumour-specific apoptosis and promotes viral dispersion in TRAIL-resistant glioblastoma**

*Eonju Oh<sup>1</sup>, JinWoo Hong<sup>1</sup>, Oh-Joon Kwon<sup>2</sup>, and Chae-Ok Yun<sup>1\*</sup>*

<sup>1</sup>Department of Bioengineering, College of Engineering, Hanyang University, 222 Wangsimni-ro, Seongdong-gu, Seoul 133-791, Korea.

<sup>2</sup>Department of Molecular and Cellular Biology, Baylor College of Medicine, Houston, TX 77030, USA

Running Title: Hypoxia- and telomerase-responsive oncolytic adenovirus expressing stTRAIL

**Keywords:** hypoxia-responsive, cancer-specific promoter, oncolytic adenovirus, stTRAIL, apoptosis, TRAIL resistance, glioblastoma

---

\*Correspondence should be addressed to C.-O. Yun (chaeok@hanyang.ac.kr), Department of Bioengineering, College of Engineering, Hanyang University, 222 Wangsimni-ro, Seongdong-gu, Seoul 04763, Korea

Tel.: +82 2-2220-0491; Fax: +82 2-2220-4850

1 **Supporting Information**

2

3 **Materials and Methods**

4

5 *Comparative transcriptional activity of cancer cell-specific promoter*

6 To assess the transcriptional activity of the mTERT, HmTERT, 5CmTERT, or  
7 H5CmTERT promoters under normoxic and hypoxic conditions, glioblastoma cells (U87MG and  
8 U251N) were transfected with green fluorescent protein (GFP)-expressing plasmids under the  
9 control of the mTERT, HmTERT, 5CmTERT, or H5CmTERT promoters. At 48 h post-  
10 transfection, the GFP expression levels were quantified using a microplate reader.

11

12

## Supplementary Figure 1

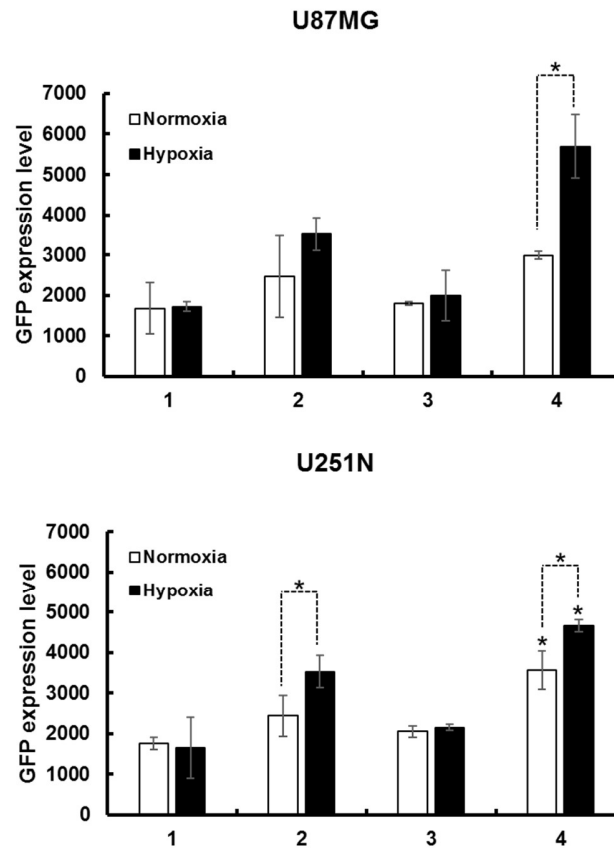

1. mTERT-GFP 2. HmTERT-GFP 3. 5CmTERT-GFP 4. H5CmTERT-GFP

1

2 **Supplementary Figure 1. GFP expression driven by the cancer cell-specific promoter.** The

3 GFP expression level driven by the mTERT, HmTERT, 5CmTERT, or H5CmTERT promoter in

4 glioblastoma cells (U87MG and U251N). GBM cells were transfected with plasmids expressing

5 GFP under the control of the mTERT, HmTERT, 5CmTERT, or H5CmTERT promoter (mTERT-

6 GFP, HmTERT-GFP, 5CmTERT-GFP, or H5CmTERT-GFP) under normoxic or hypoxic

7 condition. GFP expression levels from each group were analysed using a microplate reader after

8 48 h incubation at 37°C. Each cell line was tested at least three times and data are shown as mean

9  $\pm$  SD of triplicate experiments; \* $P < 0.05$  versus HmTERT-GFP for U251N.

Supplementary Figure 2

a

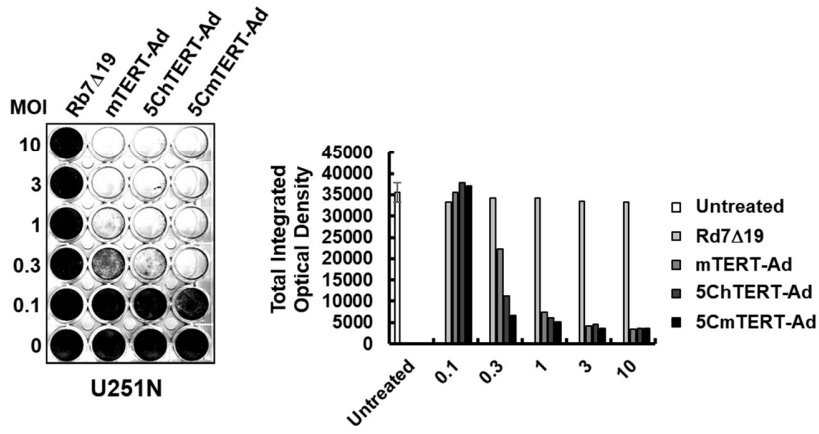

1

b

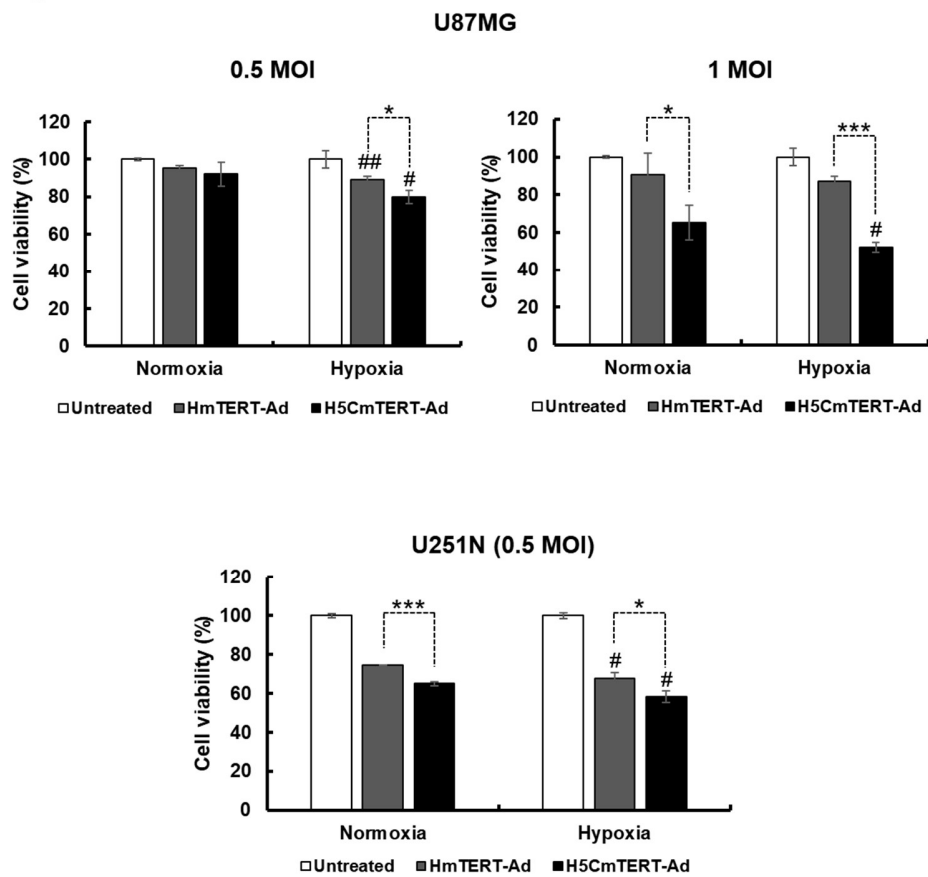

2

3

4

1 **Supplementary Figure 2. Cytopathic effect of the oncolytic adenoviruses.** (a) The cytopathic  
2 effect of oncolytic adenoviruses (Rb7 $\Delta$ 19, mTERT-Ad, 5ChTERT-Ad, or 5CmTERT-Ad) in  
3 U251N cells. At 72 h after the infection, virus-mediated attenuation in cell viability was assessed  
4 by the cytopathic effect assay. The result of cytopathic effect assay was semi-quantitatively  
5 assessed using ImageJ software. (b) Glioblastoma cells (U87MG and U251N) were infected with  
6 HmTERT-Ad or H5CmTERT-Ad at the indicated MOI and incubated under normoxic or  
7 hypoxic condition. At 48 h after the infection, the cell viability was determined by the MTT  
8 assay. Each cell line was tested at least 3 times and data are shown as mean  $\pm$  SD of triplicate  
9 experiments; \* $P$  < 0.05, \*\*\* $P$  < 0.001. # $P$  < 0.05, ## $P$  < 0.01; cell killing effect under normoxia  
10 vs. hypoxia of same virus.

11

### Supplementary Figure 3

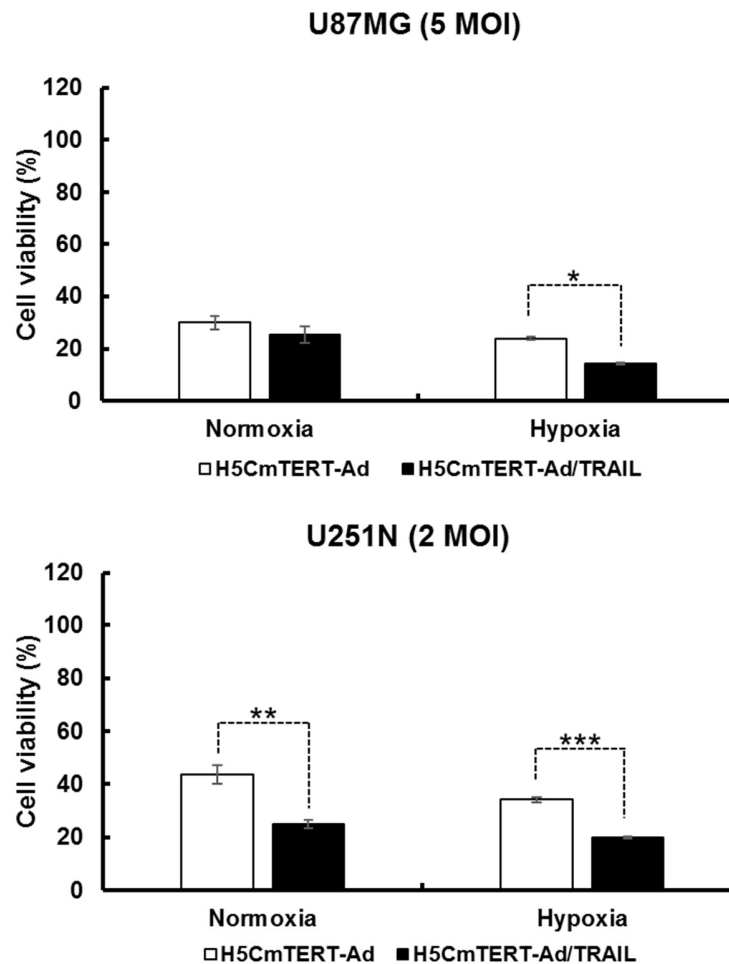

1

2 **Supplementary Figure 3. Cancer cell killing effect of the oncolytic adenoviruses.**

3 Glioblastoma cells (U87MG and U251N) were infected with H5CmTERT-Ad or H5CmTERT-

4 Ad/TRAIL at the indicated MOI and incubated under normoxic or hypoxic condition. At 48 h

5 after the infection, the cell viability was assessed by the MTT assay. Each cell line was tested at

6 least three times and data are shown as mean  $\pm$  SD of triplicate experiments.

7

## Supplementary Figure 4

### H5CmTERT-Ad/TRAIL

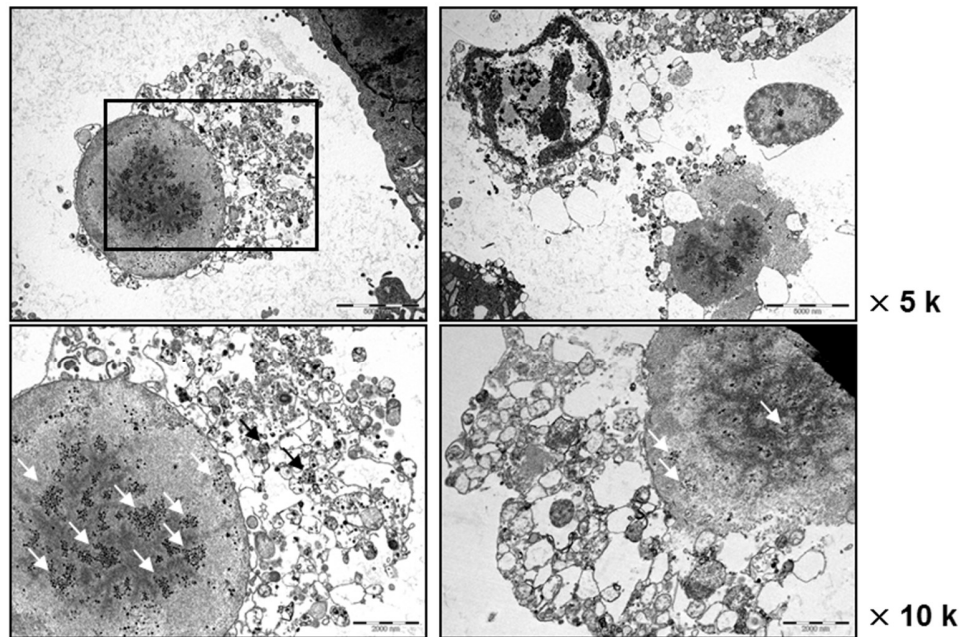

1

2 **Supplementary Figure 4. Transmission electron microscopy images of U87MG cells after**  
3 **infection with H5CmTERT-Ad/TRAIL.** U87MG cells were treated with H5CmTERT-  
4 Ad/TRAIL. At 36 h post-infection, the cells were harvested and analysed by transmission  
5 electron microscopy. Arrows indicate multiple adenovirus particles in U87MG cells. Original  
6 magnification:  $\times 5,000$  and  $\times 10,000$ .

7

8

9

## Supplementary Figure 5

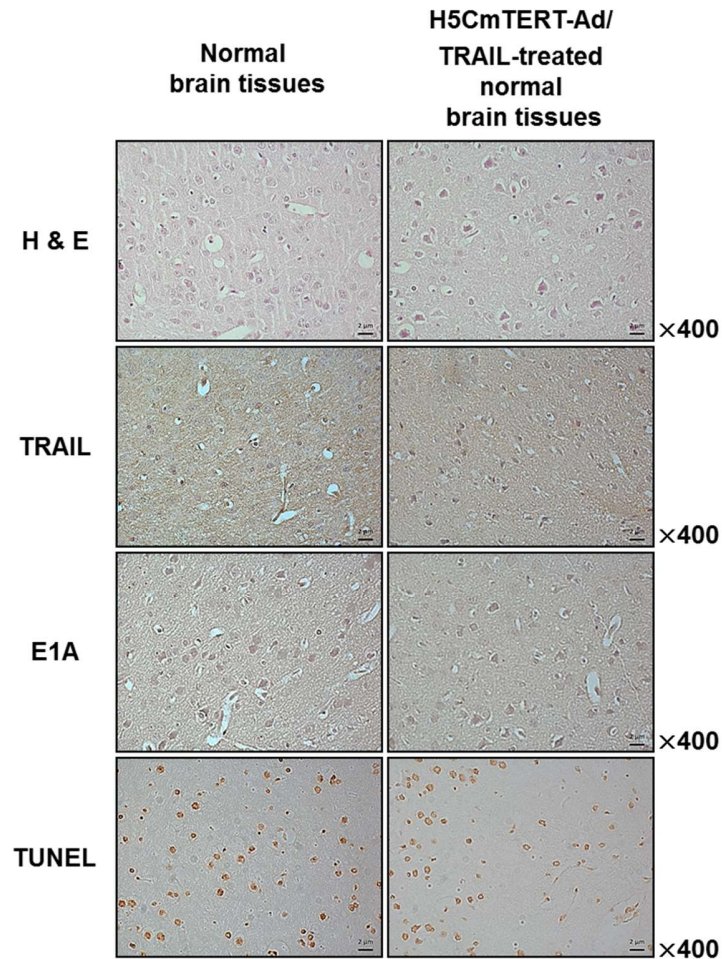

1

2 **Supplementary Figure 5. Histological and immunohistochemical analyses of normal brain**  
3 **tissues treated with H5CmTERT-Ad/TRAIL.** H5CmTERT-Ad/TRAIL ( $5 \times 10^9$  VPs) was  
4 administered to normal brain tissue of mice via intracranial injection. At 3 days after the viral  
5 injection, the mice were euthanised and the brains were collected. Representative sections were  
6 stained with H & E. The expression levels of TRAIL and E1A were assessed by  
7 immunohistochemical analysis. A TUNEL assay was performed to detect apoptosis. Data are  
8 representative of three independent experiments. Original magnification: ×400.



## Supplementary Figure 6

a

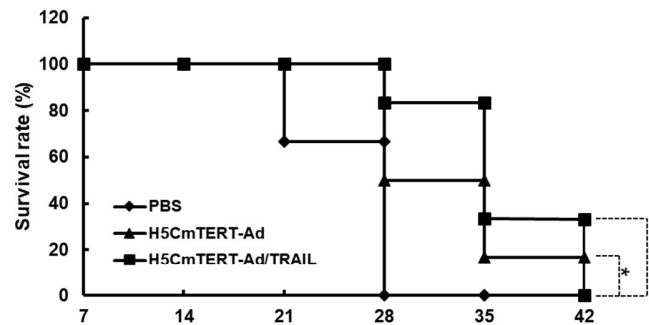

| Group             | The percentage of surviving mice (At 35 days after cell injection) | Survival rate P-value (vs. PBS) |
|-------------------|--------------------------------------------------------------------|---------------------------------|
| PBS               | 0%                                                                 | -                               |
| H5CmTERT-Ad       | 16.7%                                                              | $P < 0.05$                      |
| H5CmTERT-Ad/TRAIL | 33.3%                                                              | $P < 0.01$                      |

b

| Group             | Actual median survival time after cell injection (days) | Actual median survival P-value (vs. PBS or H5CmTERT-Ad) |
|-------------------|---------------------------------------------------------|---------------------------------------------------------|
| PBS               | 30                                                      | -                                                       |
| H5CmTERT-Ad       | 30                                                      | -                                                       |
| H5CmTERT-Ad/TRAIL | > 35                                                    | $P < 0.05$                                              |

1

2 **Supplementary Figure 6. Survival curve analysis of the U87MG/Fluc orthotopic**3 **glioblastoma tumour model.** (a) Orthotopic glioblastoma tumour model was established by

4 stereotaxically implanting firefly luciferase-expressing U87MG (U87MG/Fluc) cells into the left

5 forebrain of nude mice. At 7 days after the tumour cell injection, PBS, H5CmTERT-Rd19-Ad, or

6 H5CmTERT-Ad/TRAIL ( $5 \times 10^9$  VPs) were administered via intracranial injection. The

7 percentage of surviving mice was determined by monitoring the tumour growth-related events

1 (mice were considered dead when total flux exceeded  $1 \times 10^8$  p/s). Data presented as mean  $\pm$  SD;  
2  $*P < 0.05$ ,  $**P < 0.01$ . (b) Median survival time represents the day at which 50% mortality is  
3 actually observed in the treatment group. Data presented as mean  $\pm$  SD;  $*P < 0.05$ ; H5CmTERT-  
4 Ad/TRAIL vs. PBS or H5CmTERT-Ad.
